# Supplementary material
Source: PubMed Central journal article supplement (PMC3731905)
Supplement: CJN.08370812_CJN08370812SupplementaryData2.pdf [file CJN.08370812_CJN08370812SupplementaryData2.pdf]

L. Barisoni\*†<sup>1</sup>, C.C. Nast\*†<sup>2</sup>, J.C. Jennette\*†<sup>3</sup>, J.B.Hodgin\*†<sup>4</sup>, A.M. Herzenberg\*<sup>5</sup>,  
K.V. Lemley†<sup>6</sup>, C. M. Conway†<sup>7</sup>, J. B. Kopp†<sup>8</sup>, M. Kretzler<sup>9</sup>, C. Lienczewski<sup>9</sup>, C.  
Avila-Casado<sup>5</sup>, S. Bagnasco<sup>10</sup>, S. Sethi<sup>11</sup>, J. Tomaszewski<sup>12</sup>, A.H. Gasim<sup>3</sup>, S. M.  
Hewitt†<sup>7</sup>

*\*Authors have equally contributed to the NEPTUNE pathology scoring system*

*† Writing committee. Authors have equally contributed to the NEPTUNE protocol for digital pathology*

1 Department of Pathology, University of Miami, Miller School of Medicine, Miami, FL

2 Department of Pathology Cedars-Sinai Medical Center, Los Angeles, CA

3 Department of Pathology, University of North Carolina, Chapel Hill, NC

4 Department of Pathology, University of Michigan, Ann Arbor, MI

5 Department of Pathology, University Health Network Toronto, Toronto, Ontario, Canada

6 Department of Pediatrics, Division of Pediatric Nephrology, Children's Hospital Los Angeles,  
Los Angeles, CA

7 Laboratory of Pathology, NCI, NIH, Bethesda, MD

8 Kidney Disease Section, NIDDK, NIH, Bethesda, MD

9 Department of Internal Medicine, Nephrology, University of Michigan, Ann Arbor, MI

10 Department of Pathology, University of Buffalo, Buffalo, NY

11 Department of Pathology, Mayo Clinic, Rochester, MN

12 Department of Pathology, John Hopkins University, Baltimore, MD
